# Supplementary material for: Cardiovascular Screening of People With Severe Mental Illness in England: Views of Service Users and Providers
Source: Atypon-hosted journal article supplement (doi:10.1176/ps.62.11.pss6211_1338), 2011-11-01
Supplement: pss_62_11_1338_ds001.pdf [file pss_62_11_1338_ds001.pdf]

The following mental health and primary care trusts participated in the research: Avon & Wiltshire Mental Health Partnership NHS Trust; Barnet Enfield & Haringey Mental Health NHS Trust; Camden & Islington Mental Health & Social Care NHS Trust; Central & North West London Mental Health NHS Trust; West London Mental Health NHS Trust; Bristol North PCT; Bristol South & West PCT; Bath & North East Somerset PCT; South Gloucestershire PCT; North Somerset PCT; Barnet PCT; Camden PCT; Enfield PCT; Haringey Teaching PCT; Islington PCT; Brent Teaching PCT; Ealing PCT; Hammersmith & Fulham PCT; Kensington & Chelsea PCT; Harrow PCT; Hillingdon PCT; Hounslow PCT; and Westminster PCT.
